# Supplementary material for: Insights into the flexibility of ZrMxOy(M = Na, Mg, Al) nanofibrous membranes as promising infrared stealth materials
Source: Royal Society of Chemistry journal article supplement (doi:10.1039/c6dt00319b), 2016-01-01
Supplement: c6dt00319b1.pdf [file c6dt00319b1.pdf]

## Electrical Supplementary Information for

### **Insights into the flexibility of $ZrM_xO_y$ (M= Na, Mg, Al) nanofibrous membranes as promising infrared stealth materials**

Xue Mao,<sup>a</sup> Ying Bai,<sup>a</sup> Jianyong Yu<sup>b</sup> and Bin Ding<sup>\*abc</sup>

<sup>a</sup> State Key Laboratory for Modification of Chemical Fibers and Polymer Materials, College of Materials Science and Engineering, Donghua University, Shanghai 201620, China

<sup>b</sup> Nanofibers Research Center, Modern Textile Institute, Donghua University, Shanghai 200051, China

<sup>c</sup> Key Laboratory of Textile Science & Technology, Ministry of Education, College of Textiles, Donghua University, Shanghai, 201620, China

\* Corresponding author. E-mail: binding@dhu.edu.cn; Phone: +86-21-62378202; Fax: +86-21-62378202

**Table S1** Summary of lattice parameters, tetragonal ratio, and grain size of the Na, Mg, and Al doped ZNF membranes with the uniform dopant content of 5 mol%. Theoretical lattice constants of monoclinic and tetragonal zirconia was also given.

| Dopant     | Lattice parameters |       |       |              |             |              | Tetragonal ratio (%) | Grain size (nm) |      |
|------------|--------------------|-------|-------|--------------|-------------|--------------|----------------------|-----------------|------|
|            | a (Å)              | b (Å) | c (Å) | $\alpha$ (°) | $\beta$ (°) | $\gamma$ (°) |                      | m               | t    |
| Na         | 5.320              | 5.191 | 5.157 | 90           | 99.2        | 90           | 5.8                  | 32.7            | 60.4 |
| Mg         | 5.318              | 5.200 | 5.155 | 90           | 99.2        | 90           | 8                    | 25.2            | 31.2 |
| Al         | 3.607              | -     | 5.169 | 90           | 90          | 90           | 80.6                 | 25.8            | 22.8 |
| monoclinic | 5.313              | 5.213 | 5.147 | 90           | 99.2        | 90           | 0                    | -               | -    |
| tetragonal | 3.595              | -     | 5.193 | 90           | 90          | 90           | 100                  | -               | -    |

**Table S2** Summary of solid solution compensation mechanism, chemicals, and density of  $ZrM_xO_y$  nanofibrous membranes with the uniform dopant content of 5 mol%. Theoretical density of monoclinic and tetragonal zirconia was also given.

| Dopant     | Solid solution compensation mechanism | Chemical                        | Density (g cm <sup>-3</sup> ) |
|------------|---------------------------------------|---------------------------------|-------------------------------|
| Na         | Vacancy                               | $Zr_{0.9}Na_{0.1}O_{1.85}$      | 5.386                         |
|            | Dopant interstitial                   | $Zr_{1.8/1.85}Na_{0.2/1.85}O_2$ | 5.823                         |
| Mg         | Vacancy                               | $Zr_{0.95}Mg_{0.05}O_{1.95}$    | 5.62                          |
|            | Dopant interstitial                   | $Zr_{1.9/1.95}Mg_{0.1/1.95}O_2$ | 5.762                         |
| Al         | Vacancy                               | $Zr_{0.9}Al_{0.1}O_{1.95}$      | 5.728                         |
|            | Dopant interstitial                   | $Zr_{1.8/1.95}Al_{0.2/1.95}O_2$ | 5.875                         |
| monoclinic |                                       | $ZrO_2$                         | 5.816                         |
| tetragonal |                                       | $ZrO_2$                         | 6.097                         |

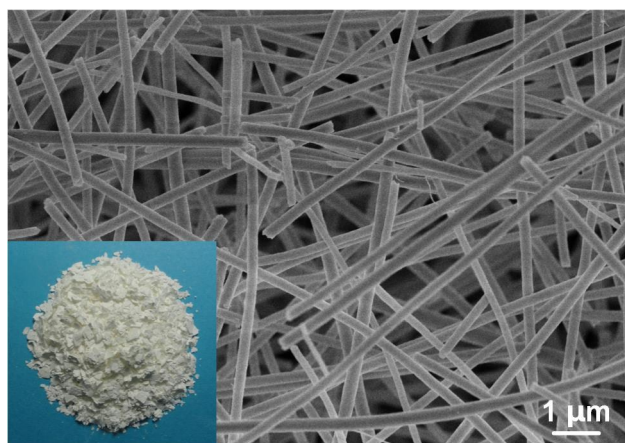

**Fig. S1** FE-SEM image of the zirconia nanofibrous membranes without dopant. Inset is the optical image of the relevant membranes.

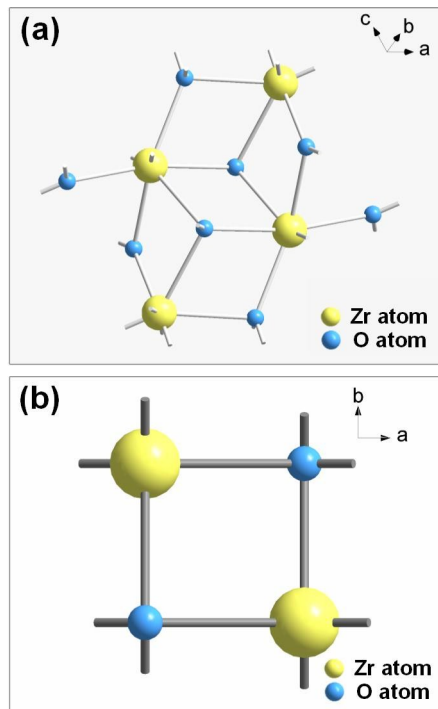

**Fig. S2** Schematic representation of theoretical (a) monoclinic and (b) tetragonal cell structures of zirconia powder, respectively.

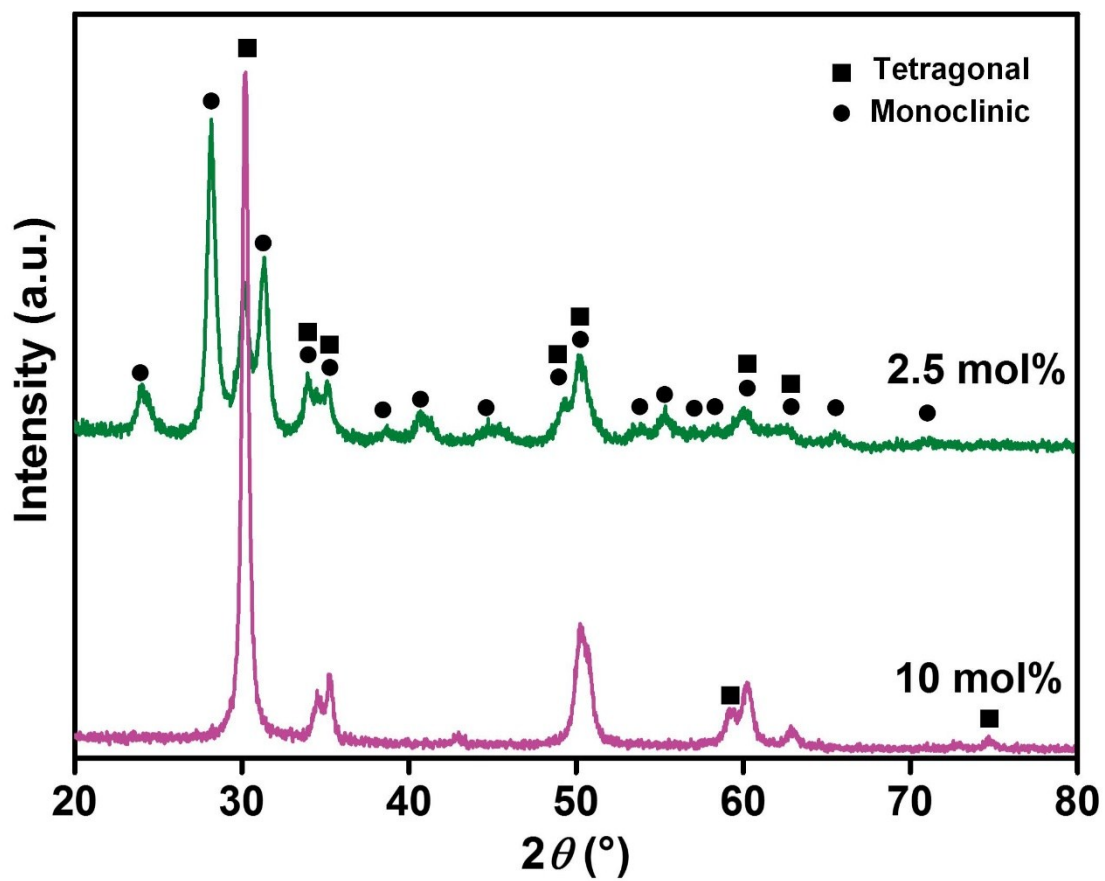

Fig. S3 XRD patterns of Al doped ZNF membranes with the dopant contents of 2.5 and 10 mol%.
